# Supplementary figures and images for: A Regression-based K nearest neighbor algorithm for gene function prediction from heterogeneous data
Source: Springer Nature journal article supplement (doi:10.1186/1471-2105-7-s1-s11), 2006-03-01

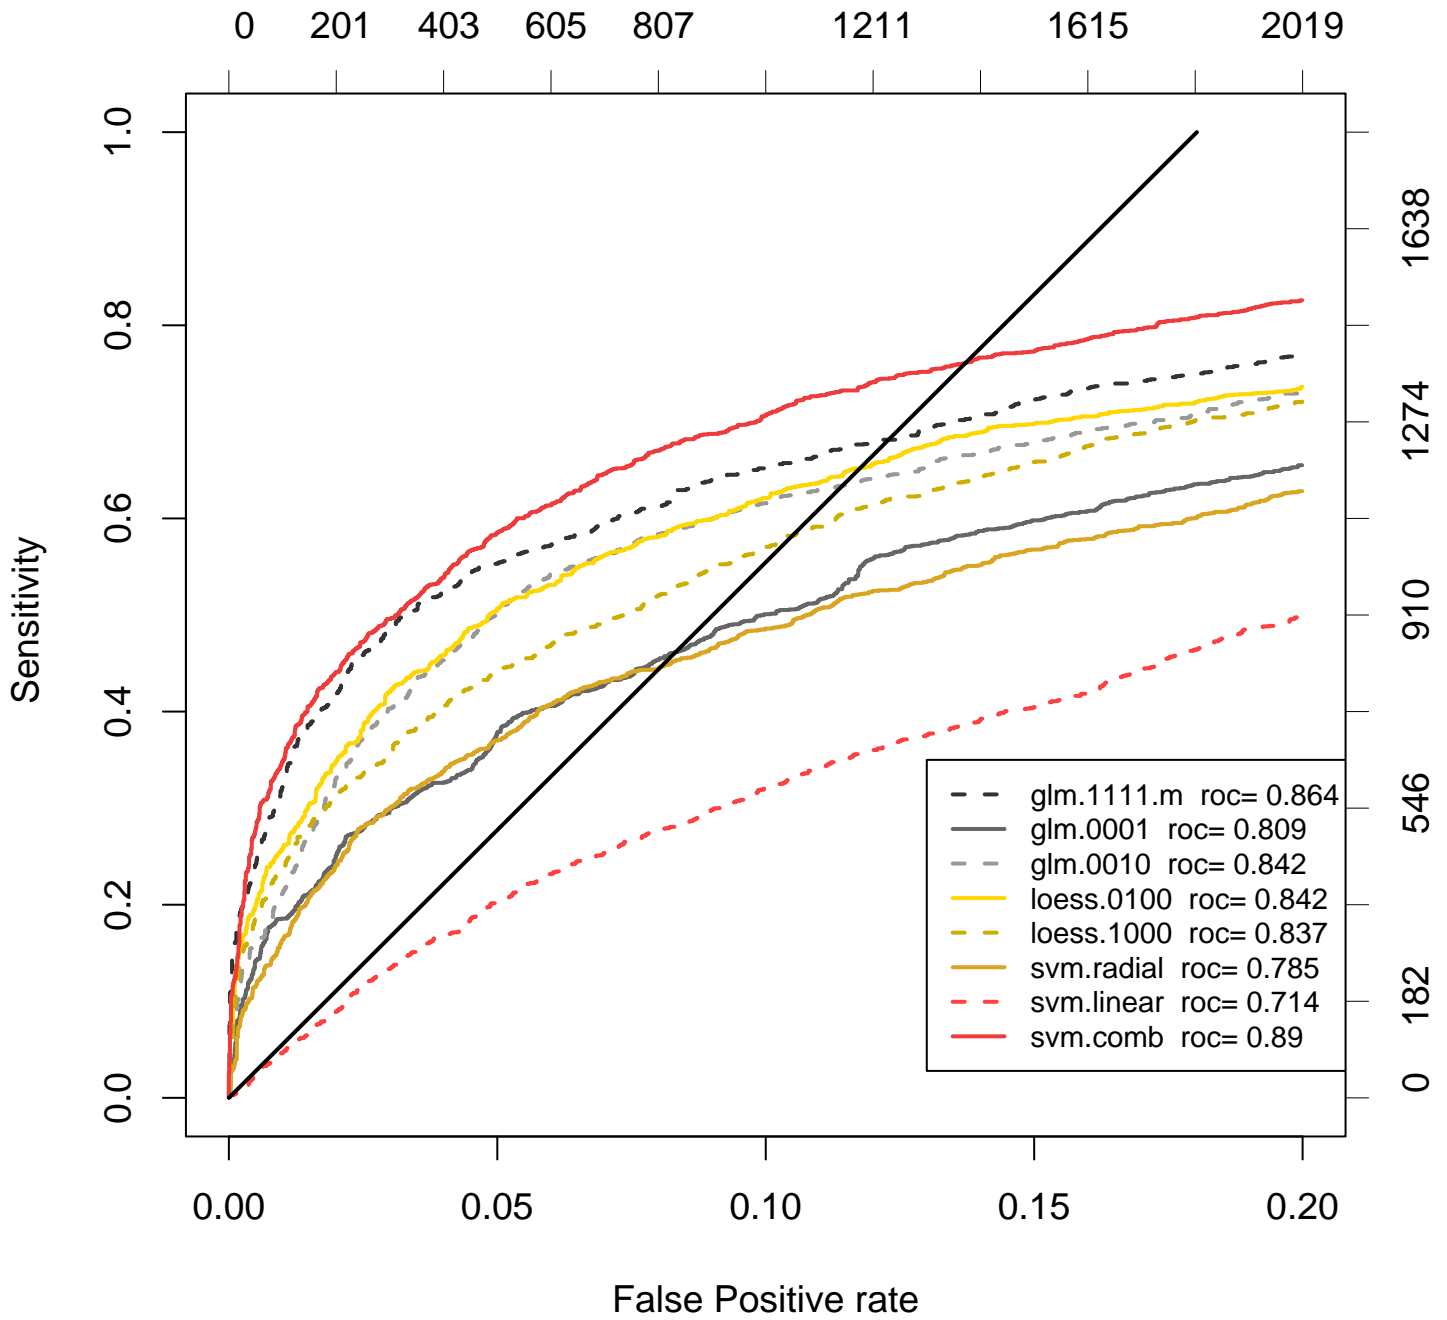

Supplement: Additional file 2 [file 1471-2105-7-s1-s11-s2.pdf]
